# Supplementary material for: Precise control of wettability from LCST tunable surface
Source: Royal Society of Chemistry journal article supplement (doi:10.1039/b918951c), 2010-01-01
Supplement: b918951c.pdf [file b918951c.pdf]

# Precise Control of Wettability from LCST Tunable Surface

Tianyi Zhao,<sup>1,2</sup> Fu-Qiang Nie,<sup>\*1</sup> Lei Jiang<sup>\*1</sup>

<sup>1</sup> National Laboratory for Molecular Sciences, Key Laboratory of Organic Solids,  
Institute of Chemistry, Chinese Academy of Sciences, Beijing 100190, P. R. China

<sup>2</sup> Graduate School of the Chinese Academy of Sciences, Beijing 100864 (P. R. China)

\* Corresponding author: [jjanglei@iccas.ac.cn](mailto:jjanglei@iccas.ac.cn), [fqnie@iccas.ac.cn](mailto:fqnie@iccas.ac.cn)

Tel: 010-82621396, Fax: 010-82627566

Other author's E-mail address: [zhaotianyi@iccas.ac.cn](mailto:zhaotianyi@iccas.ac.cn)

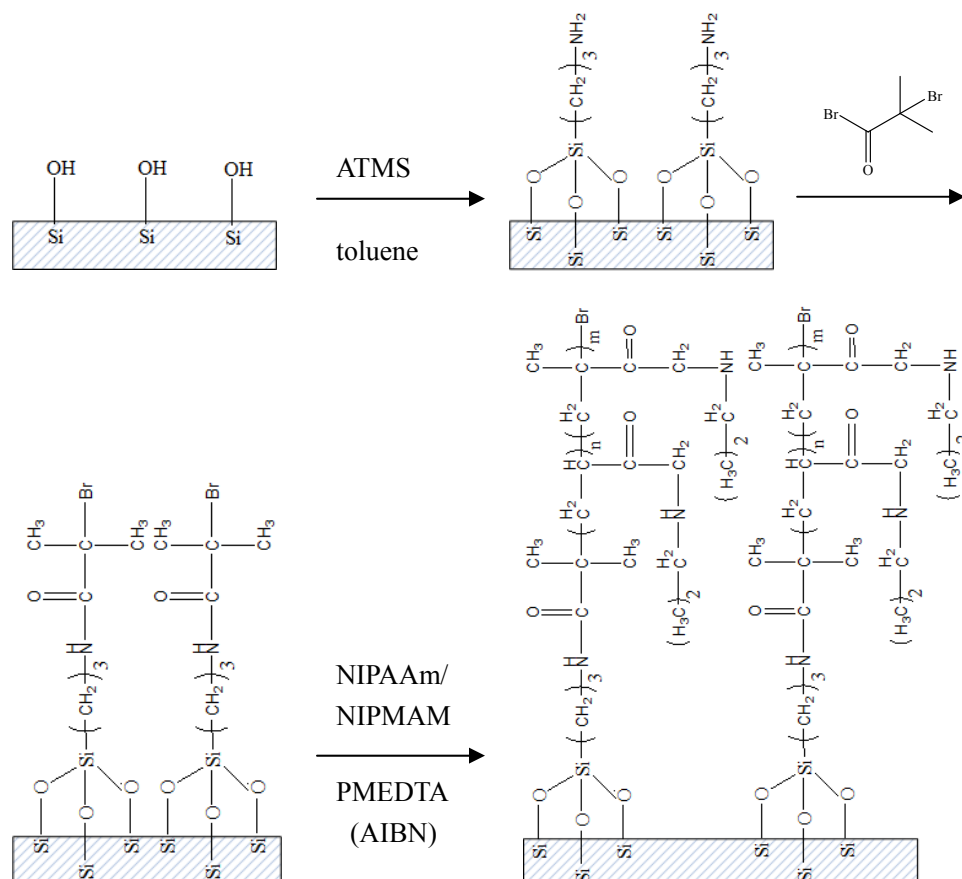

**Fig S1.** Copolymerization processes of poly(NIPAAm-co-NIPMAM) under different feeding manners of initiators.
